# Supplementary material
Source: MDPI journal article supplement (https://www.mdpi.com/2072-666X/6/4/409)
Supplement: s1 [file s1]

## Supplementary Materials

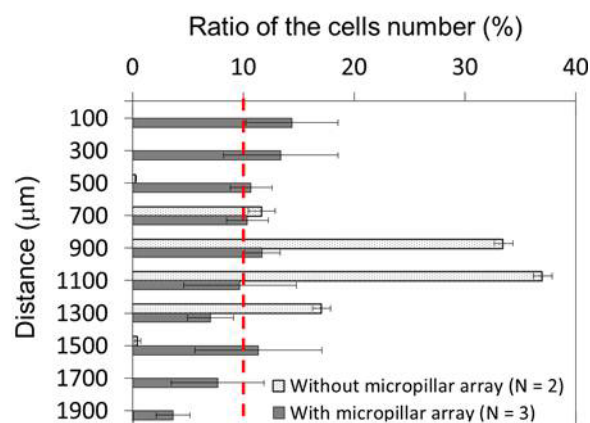

**Figure S1.** Adaptability of the method of uniform cell seeding to other cell lines. In addition to N87 cells, we checked the validity of the method to achieve uniform cellular distribution using a micropillar array. We compared the cellular distribution of HeLa cells in a microchamber without/with micro pillar array as well. Without the micro pillar array, HeLa cells were aggregated and did not spread widely. On the other hand, HeLa cells spread widely after passing through the micropillar array.

**Video S1.** Introduction of cells without the usage of the micro pillar array. Cell suspension was introduced into a microchamber from a narrow microchannel. The introduced cells were aggregated and did not spread widely inside the microchamber.

**Video S2.** Introduction of cells using the micro pillar array. Cell suspension was introduced into a microchamber with a micropillar array from a narrow micro channel. The introduced cells spread widely inside the microchamber by passing through the micropillar array.
