# Supplementary material
Source: MDPI journal article supplement (https://www.mdpi.com/2072-666X/6/4/409)
Supplement: s1 [file s1]

Archive with 3 entries (3 files):
- micromachines-78904-Supplementary Materials.pdf
- Video S1.avi
- Video S2.avi
